# Supplementary material for: Investigating the interaction between three perfluorinated carboxylic acids and the G protein-coupled estrogen receptor: spectroscopic analyses and computational simulations
Source: Royal Society of Chemistry journal article supplement (doi:10.1039/d0ay01052a), 2020-01-01

Electronic Supplementary Material (ESI) for Analytical Methods.

Figure S1 Rg values for free GPER and GPER-PFCA complexes

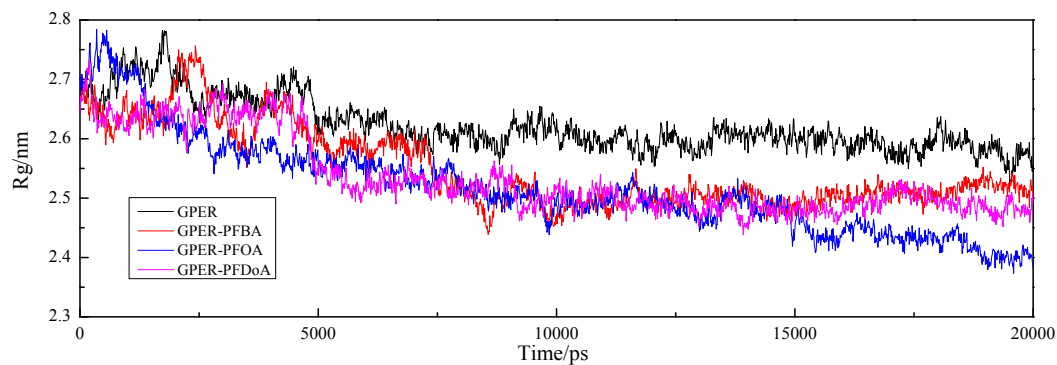

Figure S2 The average solvent accessible surface area of free GPER and GPER-PFCA complexes

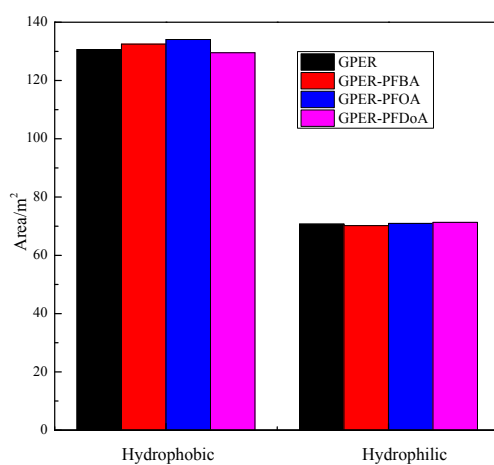

Supplement: d0ay01052a1.pdf [file d0ay01052a1.pdf]
